# Supplementary figures and images for: Optimal design and validation of antiviral siRNA for targeting HIV-1
Source: Springer Nature journal article supplement (doi:10.1186/1742-4690-4-80), 2007-01-01

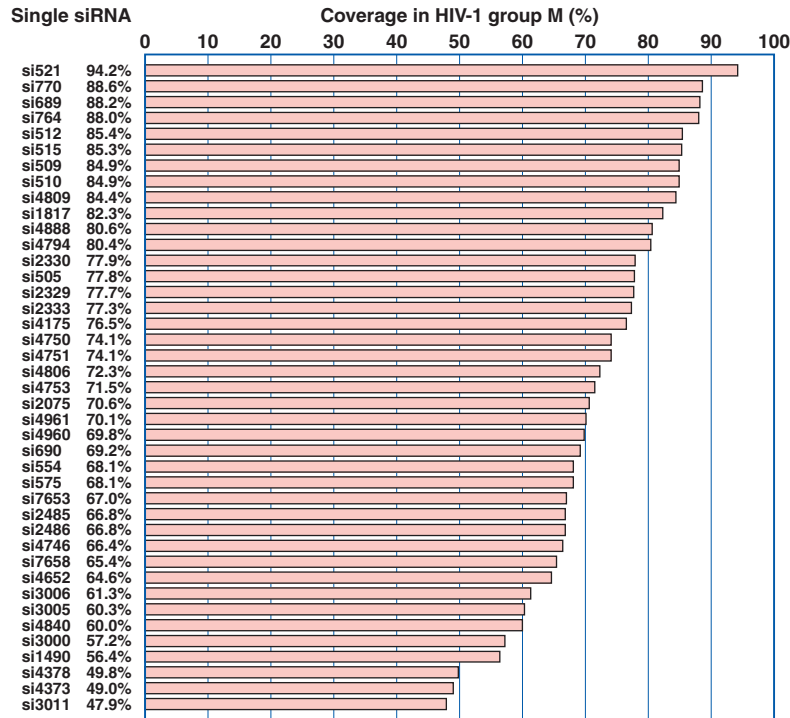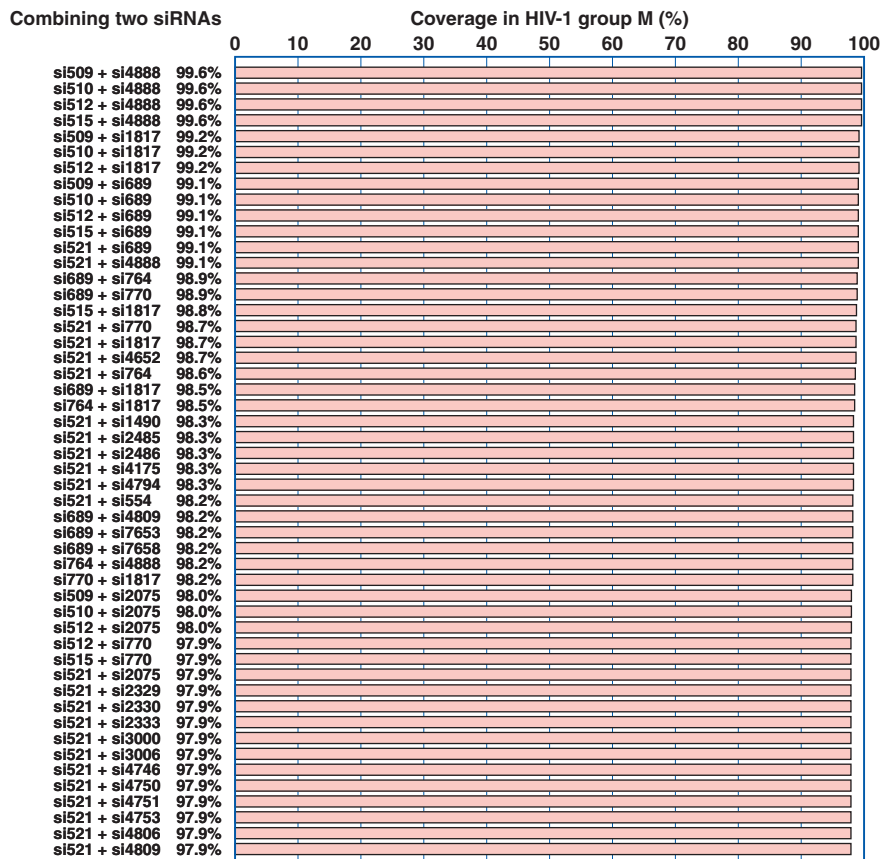

Supplement: Additional file 7 [file 1742-4690-4-80-s7.pdf]
